# Supplementary material for: One-Step Green Hydrothermal Synthesis of Few-Layer Graphene Oxide from Humic Acid
Source: MDPI journal article supplement (doi:10.3390/nano8040215), 2018-04-03
Supplement: s1 [file s1]

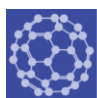

# One-Step Green Hydrothermal Synthesis of Few-Layer Graphene Oxide from Humic Acid

Guangxu Huang, Weiwei Kang, Qianhao Geng, Baolin Xing, Quanrun Liu, Jianbo Jia and Chuanxiang Zhang

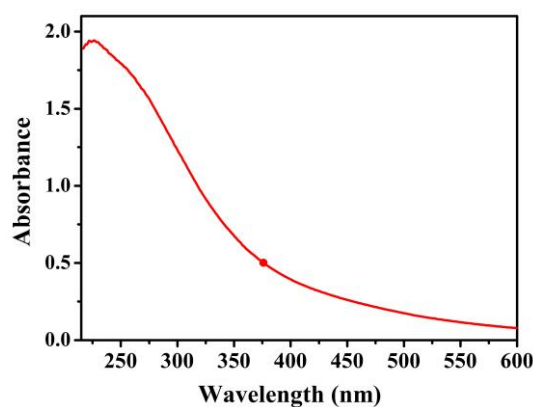

Figure S1. UV-Vis spectrum of GO<sup>H</sup>.

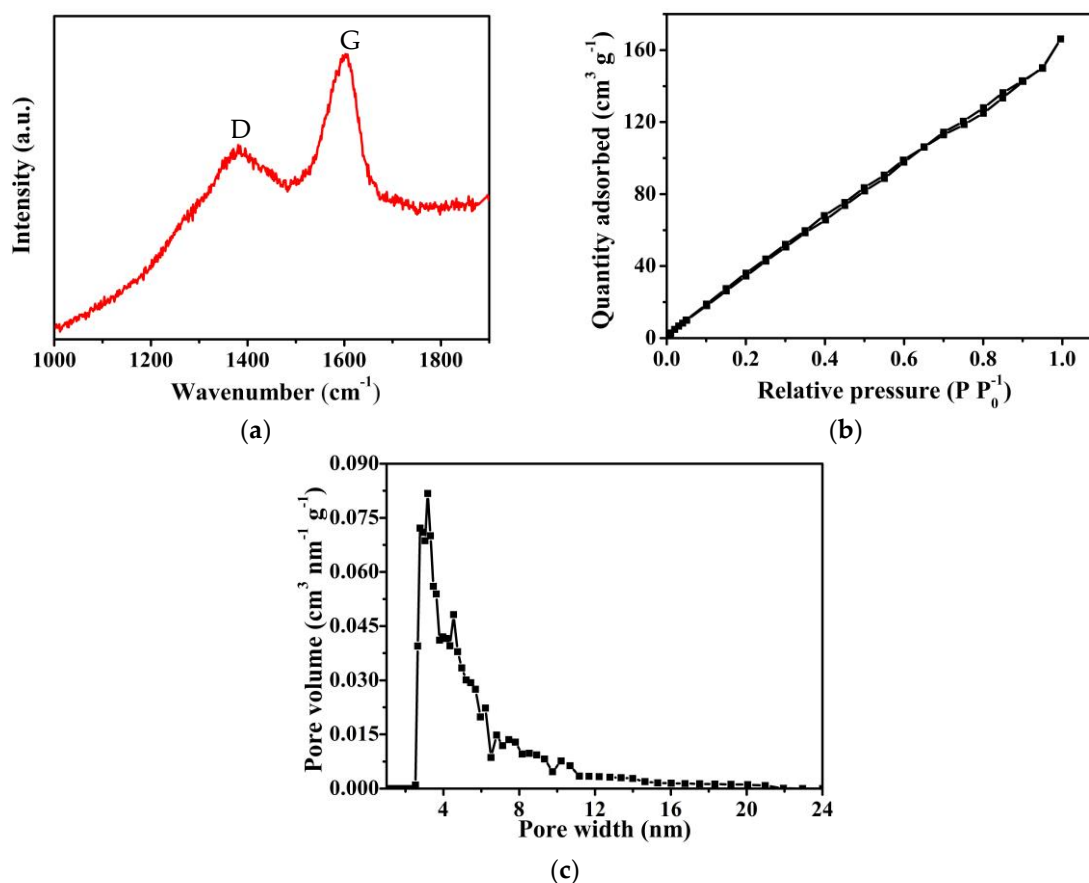

Figure S2. (a) Raman spectra, (b) N<sub>2</sub> adsorption-desorption isotherm and (c) PSD curve of r-GO<sup>H</sup>.
